# Supplementary material for: Biomolecular modifications during keratinocyte differentiation: Raman spectroscopy and chromatographic techniques
Source: Royal Society of Chemistry journal article supplement (doi:10.1039/d1an00231g), 2021-01-01

Supplementary data

**Biomolecular modifications during the keratinocytes differentiation: Raman spectroscopy and chromatographic techniques.**

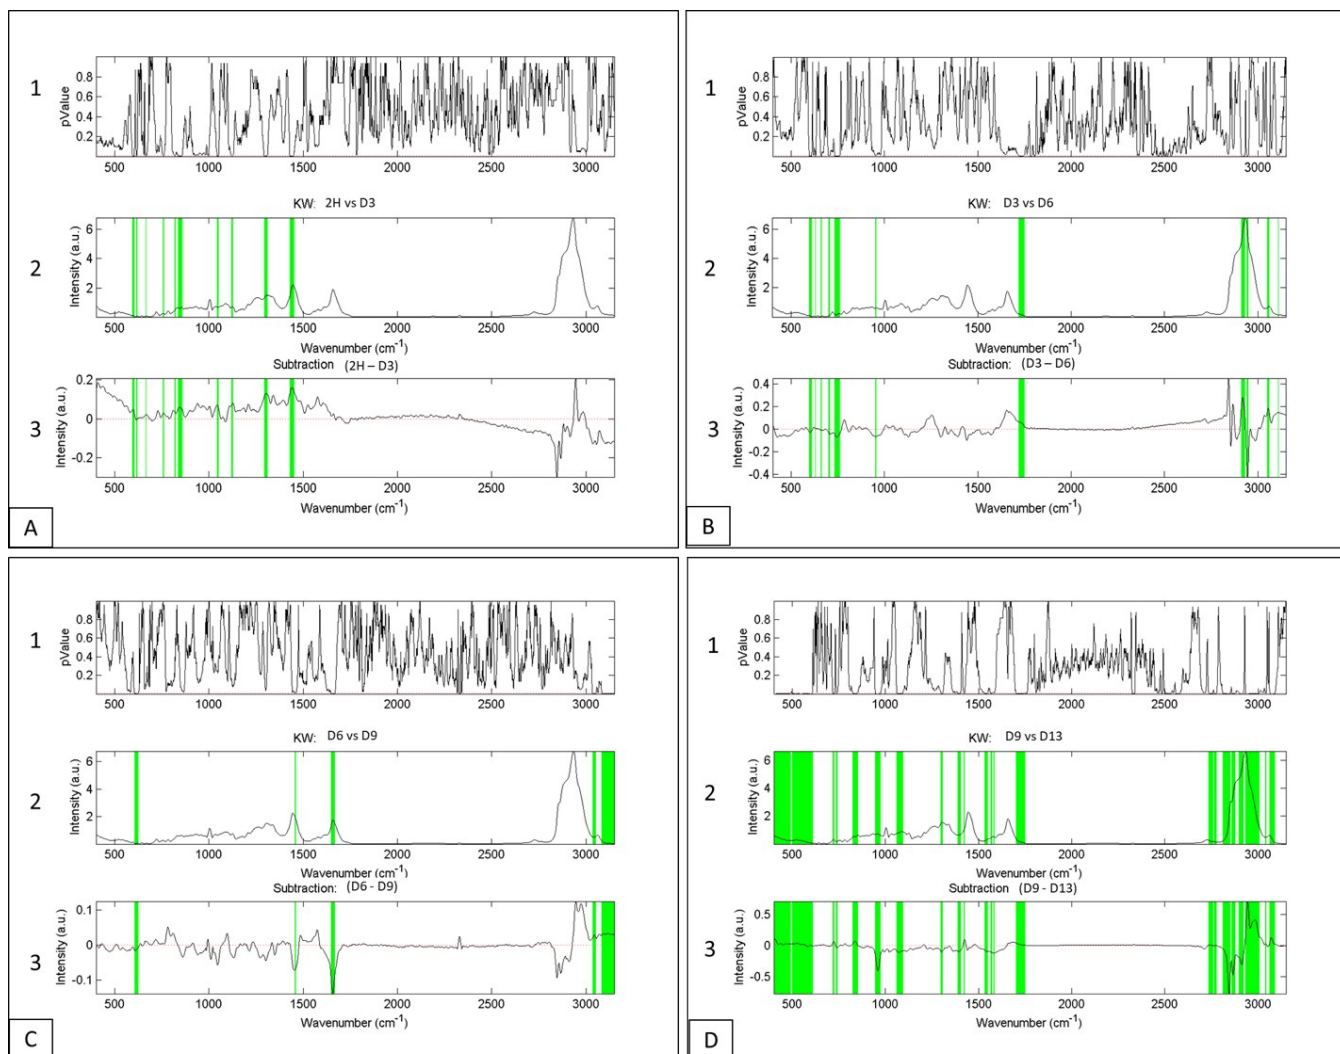

Supplement: d1an00231g1.pdf [file d1an00231g1.pdf]
